# Supplementary material for: The Possible Synergistic Pharmacological Effect of an Oral Berberine (BBR) and Curcumin (CUR) Complementary Therapy Alleviates Symptoms of Irritable Bowel Syndrome (IBS): Results from a Real-Life, Routine Clinical Practice Settings-Based Study
Source: MDPI journal article supplement (doi:10.3390/nu16081204), 2024-04-18
Supplement: s1 [file nutrients-2936931-supplementary.pdf › nutrients-2936931-supplementary.pdf]

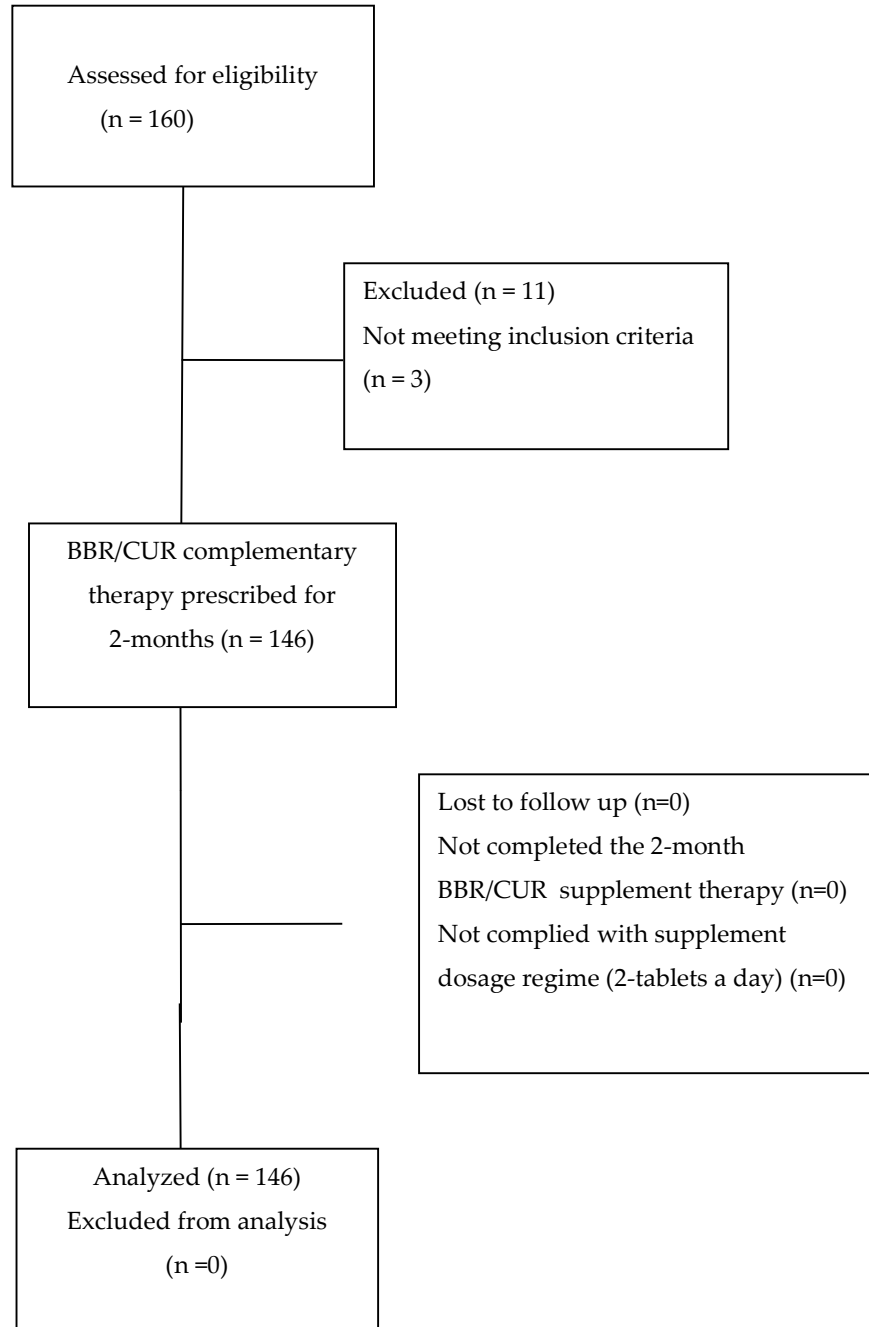

**Figure S1.** Study CONSORT flow diagram.

**Table S1.** Patient's population on concomitant IBS-D, IBS-C, and other drug treatments (N=146).

| Subgroup                        | N (%)      |
|---------------------------------|------------|
| Antidiarrheic alone (IBS-D)     | 8 (5.5)    |
| Laxative alone (IBS-C)          | 17 (11.6)  |
| Both antidiarrheic and laxative | 6 (4.1)    |
| Other drugs                     | 115 (78.8) |

**Table S2.** IBS-D patients symptoms severity (mean  $\pm$  SD) at T<sub>0</sub> and T<sub>1</sub> (N=8).

| Variable                       | N | T <sub>0</sub> | T <sub>1</sub> | Decrease between T <sub>0</sub> and T <sub>1</sub> |              |         |
|--------------------------------|---|----------------|----------------|----------------------------------------------------|--------------|---------|
|                                |   | Score          | Score          | Score                                              | 95%CI        | P-value |
| Patient's IBS symptoms         |   |                |                |                                                    |              |         |
| Abdominal pain                 | 8 | 44.4 ± 26.1    | 24.8 ± 14      | 19.6 ± 19.6                                        | 3.3 - 36     | 0.025   |
| Abdominal distension           | 8 | 53.8 ± 26.7    | 19.1 ± 14.3    | 34.6 ± 26.5                                        | 12.5 - 56.7  | 0.0076  |
| Intestinal transit             | 8 | 65 ± 13.1      | 27.5 ± 7.6     | 37.5 ± 14.1                                        | 25.7 - 49.3  | 0.0001  |
| Influence on quality of life   | 8 | 68.8 ± 14.6    | 25.6 ± 8.2     | 43.1 ± 20.2                                        | 26.3 - 60    | 0.0005  |
| IBSSI                          | 8 | 231.9 ± 57.3   | 97 ± 36.5      | 134.9 ± 52.8                                       | 90.7 - 179.1 | 0.0002  |
| Weekly Stool passage frequency |   |                |                |                                                    |              |         |
| Minimum                        | 8 | 13.1 ± 8.7     | 8.4 ± 5.2      | 4.8 ± 6.2                                          | -0.4 to -9.9 | 0.067   |
| Maximum                        | 8 | 24.5 ± 14.5    | 14.9 ± 12.1    | 9.6 ± 5.2                                          | 5.3 to -14.0 | 0.0012  |

T<sub>0</sub>: Baseline visit, T<sub>1</sub>: After 2-months BBR-CUR supplementation follow-up visit.**Table S3.** IBS-C patients symptoms severity (mean  $\pm$  SD) at T<sub>0</sub> and T<sub>1</sub> (N=17)

| Variable                       | N  | T <sub>0</sub> | T <sub>1</sub> | Decrease between T <sub>0</sub> and T <sub>1</sub> |              |         |
|--------------------------------|----|----------------|----------------|----------------------------------------------------|--------------|---------|
|                                |    | Score          | Score          | Score                                              | 95%CI        | P-value |
| Patient's IBS symptoms         |    |                |                |                                                    |              |         |
| Abdominal pain                 | 17 | 64.1 ± 13      | 40.3 ± 15.7    | 23.8 ± 14.5                                        | 16.4 - 31.3  | <.0001  |
| Abdominal distension           | 17 | 63.5 ± 16.2    | 43.5 ± 17.6    | 20 ± 18.1                                          | 10.7 - 29.3  | 0.0003  |
| Intestinal transit             | 17 | 69.7 ± 14.8    | 47.6 ± 19.2    | 22.1 ± 25.1                                        | 9.2 - 34.9   | 0.0023  |
| Influence on quality of life   | 17 | 62.4 ± 12.5    | 44.4 ± 17.1    | 17.9 ± 14.3                                        | 10.6 - 25.3  | <.0001  |
| IBSSI                          | 17 | 259.7 ± 39.2   | 175.9 ± 60.6   | 83.8 ± 62.5                                        | 51.7 - 116   | <.0001  |
| Weekly Stool passage frequency |    |                |                |                                                    |              |         |
| Minimum                        | 16 | 2.6 ± 2.2      | 5.2 ± 3.8      | -2.6 ± 3.5                                         | -4.4 to -0.7 | 0.0097  |
| Maximum                        | 17 | 9.3 ± 8.5      | 8.8 ± 5.8      | 0.5 ± 6.8                                          | -3.0 to -4.0 | 0.78    |

T<sub>0</sub>: Baseline visit, T<sub>1</sub>: After 2-months BBR-CUR supplementation follow-up visit.

## STROBE Statement—Checklist

|                              | Item No |                                                                                                                                                                                                                                                                                                                                                                                                                        |
|------------------------------|---------|------------------------------------------------------------------------------------------------------------------------------------------------------------------------------------------------------------------------------------------------------------------------------------------------------------------------------------------------------------------------------------------------------------------------|
| <b>Title and abstract</b>    | 1       | (a) Indicate the study's design with a commonly used term in the title or the abstract✓<br>(b) Provide in the abstract an informative and balanced summary of what was done and what was found✓                                                                                                                                                                                                                        |
| <b>Introduction</b>          |         |                                                                                                                                                                                                                                                                                                                                                                                                                        |
| Background/rationale         | 2       | Explain the scientific background and rationale for the investigation being reported✓                                                                                                                                                                                                                                                                                                                                  |
| Objectives                   | 3       | State specific objectives, including any prespecified hypotheses✓                                                                                                                                                                                                                                                                                                                                                      |
| <b>Methods</b>               |         |                                                                                                                                                                                                                                                                                                                                                                                                                        |
| Study design                 | 4       | Present key elements of study design early in the paper✓                                                                                                                                                                                                                                                                                                                                                               |
| Setting                      | 5       | Describe the setting, locations, and relevant dates, including periods of recruitment, exposure, follow-up, and data collection✓                                                                                                                                                                                                                                                                                       |
| Participants                 | 6       | Give the eligibility criteria, and the sources and methods of selection of participants. Describe methods of follow-up✓                                                                                                                                                                                                                                                                                                |
| Variables                    | 7       | Clearly define all outcomes, exposures, predictors, potential confounders, and effect modifiers. Give diagnostic criteria, if applicable✓                                                                                                                                                                                                                                                                              |
| Data sources/<br>measurement | 8       | For each variable of interest, give sources of data and details of methods of assessment (measurement). Describe comparability of assessment methods if there is more than one group✓                                                                                                                                                                                                                                  |
| Bias                         | 9       | Describe any efforts to address potential sources of bias. The primary outcome measure IBSSI was adjusted for baseline covariates. To reduce information and interpretation bias, the objective of the BBR-CBR supplement complementary treatment was clearly explained to each patient at inclusion visit. GPs and pharmacists enrolled patients sequentially as they arrived. There was no selection on any ground.✓ |
| Study size                   | 10      | As a retrospective study, no formal sample size calculation was made but investigators expected to include at least N=100 patients in the study. A power calculation showed that with such a sample size and assuming a baseline IBSSI of 300 and a standard deviation (SD) of 80 points, a drop of 15% in IBSSI after treatment could be detected with at least 99% power at the 5% critical level. ✓                 |
| Quantitative variables       | 11      | Explain how quantitative variables were handled in the analyses. If applicable, describe which groupings were chosen and why.✓                                                                                                                                                                                                                                                                                         |
| Statistical methods          | 12      | (a) Describe all statistical methods, including those used to control for confounding✓<br>(b) Describe any methods used to examine subgroups and interactions✓<br>(c) Explain how missing data were addressed. Missing data were neither replaced nor imputed ✓<br>(d) If applicable, explain how loss to follow-up was addressed✓<br>(e) Describe any sensitivity analyses. Not done                                  |
| <b>Results</b>               |         |                                                                                                                                                                                                                                                                                                                                                                                                                        |
| Participants                 | 13      | (a) Report numbers of individuals at each stage of study—eg numbers potentially eligible, examined for eligibility, confirmed eligible, included in the study, completing follow-up, and analysed✓<br>(b) Give reasons for non-participation at each stage✓                                                                                                                                                            |

|                          |    |                                                                                                                                                                                                                                                                                                                                                                                                                    |
|--------------------------|----|--------------------------------------------------------------------------------------------------------------------------------------------------------------------------------------------------------------------------------------------------------------------------------------------------------------------------------------------------------------------------------------------------------------------|
|                          |    | (c) Consider use of a flow diagram✓                                                                                                                                                                                                                                                                                                                                                                                |
| Descriptive data         | 14 | (a) Give characteristics of study participants (e.g., demographic, clinical, social) and information on exposures and potential confounders✓<br>(b) Indicate number of participants with missing data for each variable of interest✓<br>(c) Summarise follow-up time (eg, average and total amount)✓                                                                                                               |
| Outcome data             | 15 | Report numbers of outcome events or summary measures over time✓                                                                                                                                                                                                                                                                                                                                                    |
| Main results             | 16 | (a) Give unadjusted estimates and, if applicable, confounder-adjusted estimates and their precision ((e.g., 95% confidence interval). Make clear which confounders were adjusted for and why they were included✓<br>(b) Report category boundaries when continuous variables were categorized✓<br>(c) If relevant, consider translating estimates of relative risk into absolute risk for a meaningful time period |
| Other analyses           | 17 | Report other analyses done—(e.g., analyses of subgroups and interactions, and sensitivity analyses. NA                                                                                                                                                                                                                                                                                                             |
| <b>Discussion</b>        |    |                                                                                                                                                                                                                                                                                                                                                                                                                    |
| Key results              | 18 | Summarise key results with reference to study objectives✓                                                                                                                                                                                                                                                                                                                                                          |
| Limitations              | 19 | Discuss limitations of the study, taking into account sources of potential bias or imprecision. Discuss both direction and magnitude of any potential bias✓                                                                                                                                                                                                                                                        |
| Interpretation           | 20 | Give a cautious overall interpretation of results considering objectives, limitations, multiplicity of analyses, results from similar studies, and other relevant evidence✓                                                                                                                                                                                                                                        |
| Generalisability         | 21 | Discuss the generalisability (external validity) of the study results✓                                                                                                                                                                                                                                                                                                                                             |
| <b>Other information</b> |    |                                                                                                                                                                                                                                                                                                                                                                                                                    |
| Funding                  | 22 | Give the source of funding and the role of the funders for the present study and, if applicable, for the original study on which the present article is based✓                                                                                                                                                                                                                                                     |
